# Supplementary material for: Effects and Mechanisms of Exercise on Brain-Derived Neurotrophic Factor (BDNF) Levels and Clinical Outcomes in People with Parkinson’s Disease: A Systematic Review and Meta-Analysis
Source: MDPI journal article supplement (doi:10.3390/brainsci14030194), 2024-02-21
Supplement: s1 [file s1]

Supplementary S1. Meta-analytic results of studies of exercise-induced BDNF in human PD [40,42-46, 52-55, 61].

| Supplementary S1 |                  | Meta-analytic results of studies of exercise-induced BDNF in human PD<br>(year of publication) |                |                   |                     |                     |                |                |                |                                                                      |
|------------------|------------------|------------------------------------------------------------------------------------------------|----------------|-------------------|---------------------|---------------------|----------------|----------------|----------------|----------------------------------------------------------------------|
|                  |                  | Frazzitta (2014)                                                                               | Zoladz (2014)* | Angelucci (2016)* | Sajatovich (2017)** | O' Callaghan (2020) | Szymura (2020) | Freidle (2022) | DiCagno (2023) | Meta-analytic result                                                 |
| Meta-analysis    | Kaagman          | Yes                                                                                            | No             | No                | No                  | Yes                 | Yes            | Yes            | Yes            | N=216<br>Statistically significant<br>SMD 1.20, CI=0.53 to 1.87      |
|                  | Rotondo (2023)   | Yes                                                                                            | No             | No                | No                  | No                  | Yes            | Yes            | No             | N=180<br>Statistically significant<br>MD 5.99, CI=0.15 to 11.83      |
|                  | Li (2023)        | Yes                                                                                            | No             | No                | No                  | Yes                 | Yes            | Yes            | No             | N=192<br>Statistically significant<br>Hedges g=0.54, CI=0.10 to 0.98 |
|                  | Johansson (2022) | Yes                                                                                            | Yes            | Yes               | No                  | No                  | No             | No             | No             | N=36<br>Statistically not significant                                |
|                  | Hirsch (2018)    | Yes                                                                                            | No             | No                | Yes                 | No                  | No             | No             | No             | N=52<br>Statistically significant<br>SMD 2.06, CI=1.36 to 2.76       |

**Table note:** \*=uncontrolled pre-post test design; \*\*=comparative effectiveness design; N=number of subjects entered into meta-analysis calculation; SMD=standardized mean difference; MD=mean difference; CI=95 percent confidence interval; %=percent; Hedges g is a measure of effect size. Yes=study included in meta-analysis; No=study not included in meta-analysis
